# Supplementary material for: Effect of strand register in the stability and reactivity of crystals from peptides forming amyloid fibrils
Source: Royal Society of Chemistry journal article supplement (doi:10.1039/d3cp01762a), 2023-01-01
Supplement: d3cp01762a1.pdf [file d3cp01762a1.pdf]

# Effect of strand register in the stability and reactivity of crystals from peptides forming amyloid fibrils

Camila Muñoz-Gutiérrez,<sup>†</sup> Francisco Adasme-Carreño,<sup>‡,¶</sup> Jans Alzate Morales,<sup>†</sup>  
and Joel Ireta<sup>\*,§</sup>

<sup>†</sup>*Centro de Bioinformática, Simulación y Modelado (CBSM), Facultad de Ingeniería, Universidad de Talca, Campus Talca, 1 Poniente No. 1141, Casilla 721, Talca, Chile*

<sup>‡</sup>*Centro de Investigación de Estudios Avanzados del Maule (CIEAM), Vicerrectoría de Investigación y Postgrado, Universidad Católica del Maule, Talca 3466706, Chile*

<sup>¶</sup>*Laboratorio de Bioinformática y Química Computacional (LBQC), Departamento de Medicina Traslacional, Facultad de Medicina, Universidad Católica del Maule, Talca 3466706, Chile*

<sup>§</sup>*Departamento de Química, División de Ciencias Básicas e Ingeniería, Universidad Autónoma Metropolitana-Iztapalapa, A.P. 55-534, Ciudad de México 09340, Mexico*

E-mail: iret@xanum.uam.mx

Phone: +52 55 5804 6413

## Figures

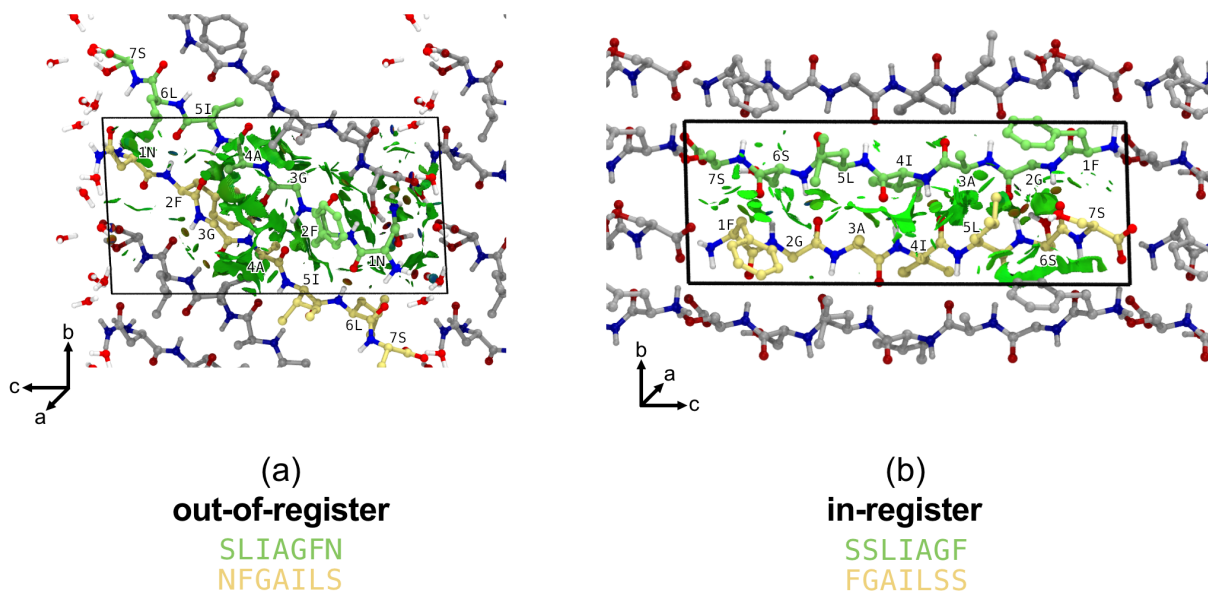

Figure S1: Noncovalent interaction (NCI) analysis of the crystals NFGAALS (out-of-register) and FGAILSS (in-register). Peptide units forming the  $\beta$ -strand dimer are colored in yellow and green. Hydrogen atoms of polar groups are shown only for clarity. Amino acids are labeled by their sequence number and one-letter code. NCI surfaces are colored using a red-green-blue scheme for repulsive, weak, and attractive forces, respectively.

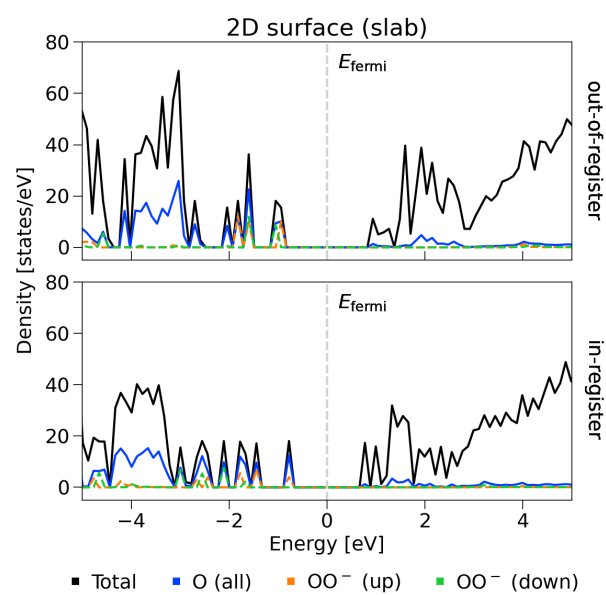

Figure S2: Density of states (DOS) and partial DOS (PDOS) of the out-of-register and in-register peptide slabs. DOS is shown in black, PDOS of all oxygen atoms in blue, and PDOS of the carboxylate oxygen atoms at the up and down faces (refer to Figure 5) in orange and green, respectively. Energies are normalized to the Fermi level.

# Tables

Table S1: Optimized lattice parameters, in Å and degrees, for peptide crystals.

| Crystal           | parameter | calculated | expt.  | % error |
|-------------------|-----------|------------|--------|---------|
| NFGAILS<br>(5E5V) | $a$       | 8.497      | 8.661  | 1.891   |
|                   | $b$       | 11.560     | 11.594 | 0.290   |
|                   | $c$       | 21.640     | 21.552 | 0.410   |
|                   | $\alpha$  | 85.149     | 86.389 | 1.435   |
|                   | $\beta$   | 81.972     | 82.209 | 0.289   |
|                   | $\gamma$  | 76.480     | 76.349 | 0.172   |
| FGAILSS<br>(5E61) | $a$       | 8.598      | 8.770  | 1.960   |
|                   | $b$       | 9.475      | 9.500  | 0.260   |
|                   | $c$       | 24.543     | 24.740 | 0.795   |
|                   | $\alpha$  | 88.599     | 88.220 | 0.429   |
|                   | $\beta$   | 81.345     | 80.000 | 1.681   |
|                   | $\gamma$  | 70.019     | 70.339 | 0.455   |
